# Supplementary material for: Intragroup Stigma Among Men Who Have Sex with Men: Data Extraction from Craigslist Ads in 11 Cities in the United States
Source: PubMed Central journal article supplement (PMC4869222; doi:10.2196/publichealth.4742), 2016-02-05
Supplement: publichealth_v2i1e4_app1.pdf [file publichealth_v2i1e4_app1.pdf]

**Appendix 1: Descriptive Statistics of Sample Characteristics by City (N=2,200)**

| Characteristics<br>(p-value)            | MSAs with the highest HIV prevalence in the United States |                      |                     |                  |                  |                |
|-----------------------------------------|-----------------------------------------------------------|----------------------|---------------------|------------------|------------------|----------------|
|                                         | New York<br>% (n)                                         | Los Angeles<br>% (n) | Washington<br>% (n) | Chicago<br>% (n) | Atlanta<br>% (n) | Miami<br>% (n) |
| <b>Race (P&lt;0.001)</b>                |                                                           |                      |                     |                  |                  |                |
| White                                   | 23.0% (46)                                                | 24.5% (49)           | 29.5% (59)          | 21.5% (43)       | 34.0% (68)       | 11.5% (23)     |
| Black                                   | 6.5% (13)                                                 | 3.5% (7)             | 10.5% (21)          | 1.5% (3)         | 12.0% (24)       | 4.5% (9)       |
| Other                                   | 5.5% (11)                                                 | 21.0% (42)           | 6.5% (13)           | 7.0% (14)        | 2.5% (5)         | 8.0% (16)      |
| Not mentioned                           | 65.0% (130)                                               | 51.0% (102)          | 53.5% (107)         | 70.0% (140)      | 51.5% (103)      | 76.0% (152)    |
| <b>Age (P=0.003)</b>                    |                                                           |                      |                     |                  |                  |                |
| 18-25                                   | 14.0% (28)                                                | 20.5% (41)           | 11.5% (23)          | 15.5% (31)       | 14.5% (29)       | 16.5% (33)     |
| 26-35                                   | 36.0% (72)                                                | 36.0% (72)           | 32.5% (65)          | 40.0% (80)       | 22.0% (44)       | 28.5% (57)     |
| 36-45                                   | 24.5% (49)                                                | 26.0% (52)           | 27.5% (55)          | 21.5% (43)       | 30.5% (61)       | 22.0% (44)     |
| 46+                                     | 17.0% (34)                                                | 8.5% (17)            | 17.5% (35)          | 16.5% (33)       | 21.0% (42)       | 23.0% (46)     |
| Not mentioned                           | 8.5% (17)                                                 | 9.0% (18)            | 11.0% (22)          | 6.5% (13)        | 12.0% (24)       | 10.0% (20)     |
| <b>Sexual Orientation (P&lt;0.001)</b>  |                                                           |                      |                     |                  |                  |                |
| Homosexual                              | 0.0% (0)                                                  | 0.0% (0)             | 0.0% (0)            | 0.5% (1)         | 0.5% (1)         | 1.0% (2)       |
| Straight                                | 4.5% (9)                                                  | 2.0% (4)             | 0.0% (0)            | 2.0% (4)         | 1.5% (3)         | 0.5% (1)       |
| Bisexual                                | 11.5% (23)                                                | 8.0% (16)            | 1.5% (3)            | 7.5% (15)        | 6.0% (12)        | 5.5% (11)      |
| Not mentioned                           | 84.0% (168)                                               | 90.0% (180)          | 98.5% (197)         | 90.0% (180)      | 92.0% (184)      | 93.0% (186)    |
| <b>HIV status (P&lt;0.001)</b>          |                                                           |                      |                     |                  |                  |                |
| Negative                                | 9.0% (18)                                                 | 25.5% (51)           | 15.5% (31)          | 12.0% (24)       | 12.0% (24)       | 10.5% (21)     |
| Positive                                | 0.0% (0)                                                  | 0.5% (1)             | 0.0% (0)            | 0.0% (0)         | 0.5% (1)         | 0.5% (1)       |
| Not mentioned                           | 91.0% (182)                                               | 74.0% (148)          | 84.5% (169)         | 88.0% (176)      | 87.5% (175)      | 89.0% (178)    |
| <b>DDF Status (P&lt;0.001)</b>          |                                                           |                      |                     |                  |                  |                |
| Not mentioned                           | 29.0% (58)                                                | 37.5% (75)           | 31.0% (62)          | 31.5% (63)       | 32.5% (65)       | 22.5% (45)     |
|                                         | 71.0% (142)                                               | 62.5% (125)          | 69.0% (138)         | 68.5% (137)      | 67.5% (135)      | 77.5% (155)    |
| <b>Physical Appearance (P&lt;0.001)</b> |                                                           |                      |                     |                  |                  |                |
| Not mentioned                           | 21.0% (42)                                                | 23.5% (47)           | 11.5% (23)          | 15.0% (30)       | 19.0% (38)       | 15.5% (31)     |
|                                         | 79.0% (158)                                               | 76.5% (153)          | 88.5% (177)         | 85.0% (170)      | 81.0% (162)      | 84.5% (169)    |

**Appendix 1 Continued: Descriptive Statistics of Sample Characteristics by City (N=2,200)**

| Characteristics<br>(p-value)            | MSAs with the highest HIV prevalence in the United States |                  |                        |                    |                 |               |
|-----------------------------------------|-----------------------------------------------------------|------------------|------------------------|--------------------|-----------------|---------------|
|                                         | Philadelphia<br>% (n)                                     | Houston<br>% (n) | San Francisco<br>% (n) | Baltimore<br>% (n) | Dallas<br>% (n) | Total<br>%(n) |
| <b>Race (P&lt;0.001)</b>                |                                                           |                  |                        |                    |                 |               |
| White                                   | 23.0% (46)                                                | 18.0% (36)       | 26.5% (53)             | 36.0% (72)         | 23.0% (46)      | 24.6% (541)   |
| Black                                   | 4.0% (8)                                                  | 5.0% (10)        | 4.5% (9)               | 14.5% (29)         | 6.5% (13)       | 6.6% (146)    |
| Other                                   | 1.5% (3)                                                  | 10.0% (20)       | 14.0% (28)             | 1.5% (3)           | 5.5% (11)       | 7.5% (166)    |
| Not mentioned                           | 71.5% (143)                                               | 67.0% (134)      | 55.0% (110)            | 48.0% (96)         | 65.0% (130)     | 61.2% (1,347) |
| <b>Age (P=0.003)</b>                    |                                                           |                  |                        |                    |                 |               |
| 18-25                                   | 19.5% (39)                                                | 28.5% (57)       | 18.5% (37)             | 17.5% (35)         | 14.0% (28)      | 17.3% (381)   |
| 26-35                                   | 32.0% (64)                                                | 27.0% (54)       | 27.5% (55)             | 28.5% (57)         | 34.5% (69)      | 31.3% (689)   |
| 36-45                                   | 24.5% (49)                                                | 21.0% (42)       | 26.0% (52)             | 18.5% (37)         | 26.5% (53)      | 24.4% (537)   |
| 46+                                     | 16.0% (32)                                                | 13.0% (26)       | 19.0% (38)             | 26.0% (52)         | 14.5% (29)      | 17.5% (384)   |
| Not mentioned                           | 8.0% (16)                                                 | 10.5% (21)       | 9.0% (18)              | 9.5% (19)          | 10.5% (21)      | 9.5% (209)    |
| <b>Sexual Orientation (P&lt;0.001)</b>  |                                                           |                  |                        |                    |                 |               |
| Homosexual                              | 0.5% (1)                                                  | 0.0% (0)         | 1.0% (2)               | 0.0% (0)           | 0.0% (0)        | 0.3% (7)      |
| Straight                                | 1.5% (3)                                                  | 1.5% (3)         | 0.0% (0)               | 1.5% (3)           | 1.0% (2)        | 1.5% (32)     |
| Bisexual                                | 5.0% (10)                                                 | 1.0% (2)         | 6.5% (13)              | 6.0% (12)          | 9.0% (18)       | 6.1% (135)    |
| Not mentioned                           | 93.0% (186)                                               | 97.5% (195)      | 92.5% (185)            | 92.5% (185)        | 90.0% (180)     | 92.1% (2,026) |
| <b>HIV status (P&lt;0.001)</b>          |                                                           |                  |                        |                    |                 |               |
| Negative                                | 8.0% (16)                                                 | 13.5% (27)       | 18.5% (37)             | 8.5% (17)          | 11.0% (22)      | 13.1% (288)   |
| Positive                                | 0.5% (1)                                                  | 0.0% (0)         | 0.0% (0)               | 1.5% (3)           | 1.0% (2)        | 0.4% (9)      |
| Not mentioned                           | 91.5% (183)                                               | 86.5% (173)      | 81.5% (163)            | 90.0% (180)        | 88.0% (176)     | 86.5% (1,903) |
| <b>DDF Status (P&lt;0.001)</b>          |                                                           |                  |                        |                    |                 |               |
| DDF                                     | 25.5% (51)                                                | 36.5% (73)       | 38.5% (77)             | 30.5% (61)         | 34.0% (68)      | 31.7% (698)   |
| Not mentioned                           | 74.5% (149)                                               | 63.5% (127)      | 61.5% (123)            | 69.5% (139)        | 66.0% (132)     | 68.3% (1,502) |
| <b>Physical Appearance (P&lt;0.001)</b> |                                                           |                  |                        |                    |                 |               |
| Physical appearance                     | 19.0% (38)                                                | 12.5% (25)       | 0.00%                  | 12.5% (25)         | 11.0% (22)      | 16.7% (368)   |
| Not mentioned                           | 81.0% (162)                                               | 87.5% (175)      | 76.5% (153)            | 87.5% (175)        | 89.0% (178)     | 83.3% (1,832) |
